# Supplementary material
Source: publisher site journal article supplement (https://www.kjim.org/upload/media/kjim-2025-171-Supplementary-Table-13.pdf)
Supplement: Supplementary file 1 [file kjim-2025-171-Supplementary-Table-13.pdf]

**Supplementary Table 13. Stratification analysis of the incident risk of other diseases of the gallbladder and the pancreas following zoster vaccination in the propensity score-matched cohort**

| Others <sup>a)</sup>                 | Events, n (%) | Incidence rate <sup>c)</sup> | aHR (95% CI)                      |                                   |
|--------------------------------------|---------------|------------------------------|-----------------------------------|-----------------------------------|
|                                      |               |                              | Model 1 <sup>d)</sup>             | Model 2 <sup>e)</sup>             |
| Sex                                  |               |                              |                                   |                                   |
| Male                                 |               |                              |                                   |                                   |
| Unvaccinated                         | 10,269 (3.23) | 2.55                         | 1.0 (reference)                   | 1.0 (reference)                   |
| Vaccinated                           | 8817 (2.74)   | 2.43                         | 0.92 (0.90 to 0.95) <sup>f)</sup> | 0.92 (0.89 to 0.95) <sup>f)</sup> |
| Female                               |               |                              |                                   |                                   |
| Unvaccinated                         | 14,280 (3.45) | 3.55                         | 1.0 (reference)                   | 1.0 (reference)                   |
| Vaccinated                           | 13,255 (3.24) | 3.65                         | 0.97 (0.95 to 1.00)               | 0.96 (0.94 to 0.99)               |
| Age (yr)                             |               |                              |                                   |                                   |
| < 60                                 |               |                              |                                   |                                   |
| Unvaccinated                         | 9,438 (4.85)  | 2.35                         | 1.0 (reference)                   | 1.0 (reference)                   |
| Vaccinated                           | 7,886 (4.01)  | 2.17                         | 0.86 (0.84 to 0.89) <sup>f)</sup> | 0.86 (0.83 to 0.88) <sup>f)</sup> |
| ≥ 60                                 |               |                              |                                   |                                   |
| Unvaccinated                         | 15,111 (2.82) | 3.75                         | 1.0 (reference)                   | 1.0 (reference)                   |
| Vaccinated                           | 14,186 (2.65) | 3.91                         | 1.01 (0.99 to 1.03)               | 1.00 (0.98 to 1.03)               |
| Region of residence                  |               |                              |                                   |                                   |
| Urban                                |               |                              |                                   |                                   |
| Unvaccinated                         | 12,249 (3.61) | 3.04                         | 1.0 (reference)                   | 1.0 (reference)                   |
| Vaccinated                           | 11,380 (3.35) | 3.14                         | 0.98 (0.95 to 1.00)               | 0.97 (0.95 to 1.00)               |
| Rural                                |               |                              |                                   |                                   |
| Unvaccinated                         | 12,300 (3.14) | 3.06                         | 1.0 (reference)                   | 1.0 (reference)                   |
| Vaccinated                           | 10,692 (2.73) | 2.95                         | 0.93 (0.90 to 0.95) <sup>f)</sup> | 0.92 (0.90 to 0.95) <sup>f)</sup> |
| Household income                     |               |                              |                                   |                                   |
| Low (0th–39th percentile)            |               |                              |                                   |                                   |
| Unvaccinated                         | 6,780 (3.21)  | 1.68                         | 1.0 (reference)                   | 1.0 (reference)                   |
| Vaccinated                           | 6,004 (2.86)  | 1.65                         | 0.95 (0.92 to 0.98) <sup>f)</sup> | 0.94 (0.91 to 0.98) <sup>f)</sup> |
| Middle (40th–79th percentile)        |               |                              |                                   |                                   |
| Unvaccinated                         | 8,636 (3.27)  | 2.15                         | 1.0 (reference)                   | 1.0 (reference)                   |
| Vaccinated                           | 7,562 (2.89)  | 2.08                         | 0.95 (0.92 to 0.98) <sup>f)</sup> | 0.94 (0.91 to 0.97) <sup>f)</sup> |
| High (80th–100th percentile)         |               |                              |                                   |                                   |
| Unvaccinated                         | 9,133 (3.58)  | 2.27                         | 1.0 (reference)                   | 1.0 (reference)                   |
| Vaccinated                           | 8,506 (3.28)  | 2.34                         | 0.96 (0.93 to 0.99) <sup>f)</sup> | 0.95 (0.93 to 0.98) <sup>f)</sup> |
| Body mass index (kg/m <sup>2</sup> ) |               |                              |                                   |                                   |
| < 23.0                               |               |                              |                                   |                                   |
| Unvaccinated                         | 7,023 (3.67)  | 1.75                         | 1.0 (reference)                   | 1.0 (reference)                   |
| Vaccinated                           | 6,483 (3.39)  | 1.79                         | 0.97 (0.94 to 1.00)               | 0.96 (0.93 to 0.99) <sup>f)</sup> |
| 23.0–24.9                            |               |                              |                                   |                                   |
| Unvaccinated                         | 7,038 (3.51)  | 1.75                         | 1.0 (reference)                   | 1.0 (reference)                   |
| Vaccinated                           | 6,359 (3.20)  | 1.75                         | 0.97 (0.94 to 1.00)               | 0.96 (0.93 to 0.99) <sup>f)</sup> |
| ≥ 25.0                               |               |                              |                                   |                                   |
| Unvaccinated                         | 10,488 (3.09) | 2.61                         | 1.0 (reference)                   | 1.0 (reference)                   |
| Vaccinated                           | 9,230 (2.71)  | 2.54                         | 0.93 (0.90 to 0.96) <sup>f)</sup> | 0.93 (0.90 to 0.95) <sup>f)</sup> |

Supplementary Table 13. Continued

| Others <sup>a)</sup>                       | Events, n (%) | Incidence rate <sup>c)</sup> | aHR (95% CI)                      |                                   |
|--------------------------------------------|---------------|------------------------------|-----------------------------------|-----------------------------------|
|                                            |               |                              | Model 1 <sup>d)</sup>             | Model 2 <sup>e)</sup>             |
| Smoking status <sup>b)</sup>               |               |                              |                                   |                                   |
| Non-smoker                                 |               |                              |                                   |                                   |
| Unvaccinated                               | 17,332 (3.43) | 4.31                         | 1.0 (reference)                   | 1.0 (reference)                   |
| Vaccinated                                 | 15,664 (3.13) | 4.32                         | 0.96 (0.94 to 0.98) <sup>f)</sup> | 0.95 (0.93 to 0.97) <sup>f)</sup> |
| Smoker                                     |               |                              |                                   |                                   |
| Unvaccinated                               | 7,217 (3.20)  | 1.79                         | 1.0 (reference)                   | 1.0 (reference)                   |
| Vaccinated                                 | 6,408 (2.78)  | 1.77                         | 0.94 (0.91 to 0.97) <sup>f)</sup> | 0.94 (0.91 to 0.97) <sup>f)</sup> |
| Alcohol consumption (day per week)         |               |                              |                                   |                                   |
| < 1                                        |               |                              |                                   |                                   |
| Unvaccinated                               | 11,471 (2.83) | 2.85                         | 1.0 (reference)                   | 1.0 (reference)                   |
| Vaccinated                                 | 9,229 (2.29)  | 2.54                         | 0.86 (0.83 to 0.88) <sup>f)</sup> | 0.85 (0.83 to 0.88) <sup>f)</sup> |
| 1–4                                        |               |                              |                                   |                                   |
| Unvaccinated                               | 12,686 (4.05) | 3.15                         | 1.0 (reference)                   | 1.0 (reference)                   |
| Vaccinated                                 | 12,463 (3.97) | 3.43                         | 1.02 (0.99 to 1.05)               | 1.02 (0.99 to 1.04)               |
| ≥ 5                                        |               |                              |                                   |                                   |
| Unvaccinated                               | 392 (3.25)    | 0.10                         | 1.0 (reference)                   | 1.0 (reference)                   |
| Vaccinated                                 | 380 (2.88)    | 0.10                         | 0.96 (0.83 to 1.11)               | 0.95 (0.82 to 1.09)               |
| Physical activity                          |               |                              |                                   |                                   |
| Insufficient physical activity             |               |                              |                                   |                                   |
| Unvaccinated                               | 18,630 (3.32) | 4.63                         | 1.0 (reference)                   | 1.0 (reference)                   |
| Vaccinated                                 | 16,665 (3.00) | 4.59                         | 0.96 (0.94 to 0.98) <sup>f)</sup> | 0.95 (0.93 to 0.97) <sup>f)</sup> |
| Sufficient physical activity               |               |                              |                                   |                                   |
| Unvaccinated                               | 5,919 (3.48)  | 1.47                         | 1.0 (reference)                   | 1.0 (reference)                   |
| Vaccinated                                 | 5,407 (3.08)  | 1.49                         | 0.94 (0.91 to 0.98) <sup>f)</sup> | 0.93 (0.90 to 0.97) <sup>f)</sup> |
| Medication use for coronary artery disease |               |                              |                                   |                                   |
| No                                         |               |                              |                                   |                                   |
| Unvaccinated                               | 23,679 (3.36) | 5.88                         | 1.0 (reference)                   | 1.0 (reference)                   |
| Vaccinated                                 | 21,279 (3.02) | 5.86                         | 0.95 (0.93 to 0.97) <sup>f)</sup> | 0.95 (0.93 to 0.96) <sup>f)</sup> |
| Yes                                        |               |                              |                                   |                                   |
| Unvaccinated                               | 870 (3.32)    | 0.22                         | 1.0 (reference)                   | 1.0 (reference)                   |
| Vaccinated                                 | 793 (3.07)    | 0.22                         | 0.97 (0.88 to 1.07)               | 0.97 (0.88 to 1.06)               |
| Medication use for hypertension            |               |                              |                                   |                                   |
| No                                         |               |                              |                                   |                                   |
| Unvaccinated                               | 16,599 (3.41) | 4.12                         | 1.0 (reference)                   | 1.0 (reference)                   |
| Vaccinated                                 | 14,533 (3.04) | 4.01                         | 0.95 (0.93 to 0.97) <sup>f)</sup> | 0.94 (0.92 to 0.97) <sup>f)</sup> |
| Yes                                        |               |                              |                                   |                                   |
| Unvaccinated                               | 7,950 (3.25)  | 1.98                         | 1.0 (reference)                   | 1.0 (reference)                   |
| Vaccinated                                 | 7,539 (2.98)  | 2.08                         | 0.95 (0.92 to 0.98) <sup>f)</sup> | 0.95 (0.92 to 0.98) <sup>f)</sup> |

Supplementary Table 13. Continued

| Others <sup>a)</sup>              | Events, n (%) | Incidence rate <sup>c)</sup> | aHR (95% CI)                      |                                   |
|-----------------------------------|---------------|------------------------------|-----------------------------------|-----------------------------------|
|                                   |               |                              | Model 1 <sup>d)</sup>             | Model 2 <sup>e)</sup>             |
| Medication use for diabetes       |               |                              |                                   |                                   |
| No                                |               |                              |                                   |                                   |
| Unvaccinated                      | 21,338 (3.36) | 5.30                         | 1.0 (reference)                   | 1.0 (reference)                   |
| Vaccinated                        | 18,993 (3.02) | 5.23                         | 0.96 (0.94 to 0.97) <sup>f)</sup> | 0.95 (0.93 to 0.97) <sup>f)</sup> |
| Yes                               |               |                              |                                   |                                   |
| Unvaccinated                      | 3,211 (3.32)  | 0.80                         | 1.0 (reference)                   | 1.0 (reference)                   |
| Vaccinated                        | 3,079 (2.99)  | 0.85                         | 0.93 (0.88 to 0.98) <sup>f)</sup> | 0.92 (0.88 to 0.97) <sup>f)</sup> |
| Medication use for hyperlipidemia |               |                              |                                   |                                   |
| No                                |               |                              |                                   |                                   |
| Unvaccinated                      | 20,796 (3.32) | 5.17                         | 1.0 (reference)                   | 1.0 (reference)                   |
| Vaccinated                        | 18,570 (3.00) | 5.12                         | 0.96 (0.94 to 0.98) <sup>f)</sup> | 0.95 (0.94 to 0.97) <sup>f)</sup> |
| Yes                               |               |                              |                                   |                                   |
| Unvaccinated                      | 3,753 (3.56)  | 0.93                         | 1.0 (reference)                   | 1.0 (reference)                   |
| Vaccinated                        | 3,502 (3.13)  | 0.97                         | 0.90 (0.86 to 0.94) <sup>f)</sup> | 0.90 (0.85 to 0.94) <sup>f)</sup> |

aHR, adjusted hazard ratio; CI, confidence interval.

<sup>a)</sup>Others include other diseases of the gallbladder and the pancreas.

<sup>b)</sup>Non-smoker indicates individuals who do not currently smoke.

<sup>c)</sup>Incidence rate expressed as per 1,000 person-years.

<sup>d)</sup>Models 1: adjusted for age (50–54, 55–59, 60–64, and ≥ 65 years) and sex.

<sup>e)</sup>Model 2: adjusted for age (50–54, 55–59, 60–64, and ≥ 65 years); sex; household income (low income, middle income, and high income); region of residence (urban and rural); Charlson comorbidity index (0, 1, and ≥ 2); obesity (underweight [ $< 18.5 \text{ kg/m}^2$ ], normal [ $18.5\text{--}22.9 \text{ kg/m}^2$ ], overweight [ $23.0\text{--}24.9 \text{ kg/m}^2$ ], and obese [ $\geq 25.0 \text{ kg/m}^2$ ]); blood pressure (systolic blood pressure  $< 140 \text{ mmHg}$  and diastolic blood pressure  $< 90 \text{ mmHg}$  and systolic blood pressure  $\geq 140 \text{ mmHg}$  or diastolic blood pressure  $\geq 90 \text{ mmHg}$ ); fasting blood glucose ( $< 100$  and  $\geq 100 \text{ mg/dL}$ ); glomerular filtration rate ( $< 60$ ,  $60\text{--}89$ , and  $\geq 90 \text{ mL/min/1.73 m}^2$ ); smoking status (non-, ex-, and current smoker); alcohol consumption (drinks;  $< 1$ ,  $1\text{--}2$ ,  $3\text{--}4$ , and  $\geq 5$  days per week); aerobic physical activity (sufficient and insufficient); and history of medication use for coronary artery disease, diabetes mellitus, dyslipidemia, and hypertension.

<sup>f)</sup>Significant differences ( $p < 0.05$ ).
